# Supplementary figures and images for: Mechanisms of Ethanol-Induced Cerebellar Ataxia: Underpinnings of Neuronal Death in the Cerebellum
Source: MDPI journal article supplement (doi:10.3390/ijerph18168678), 2021-08-18

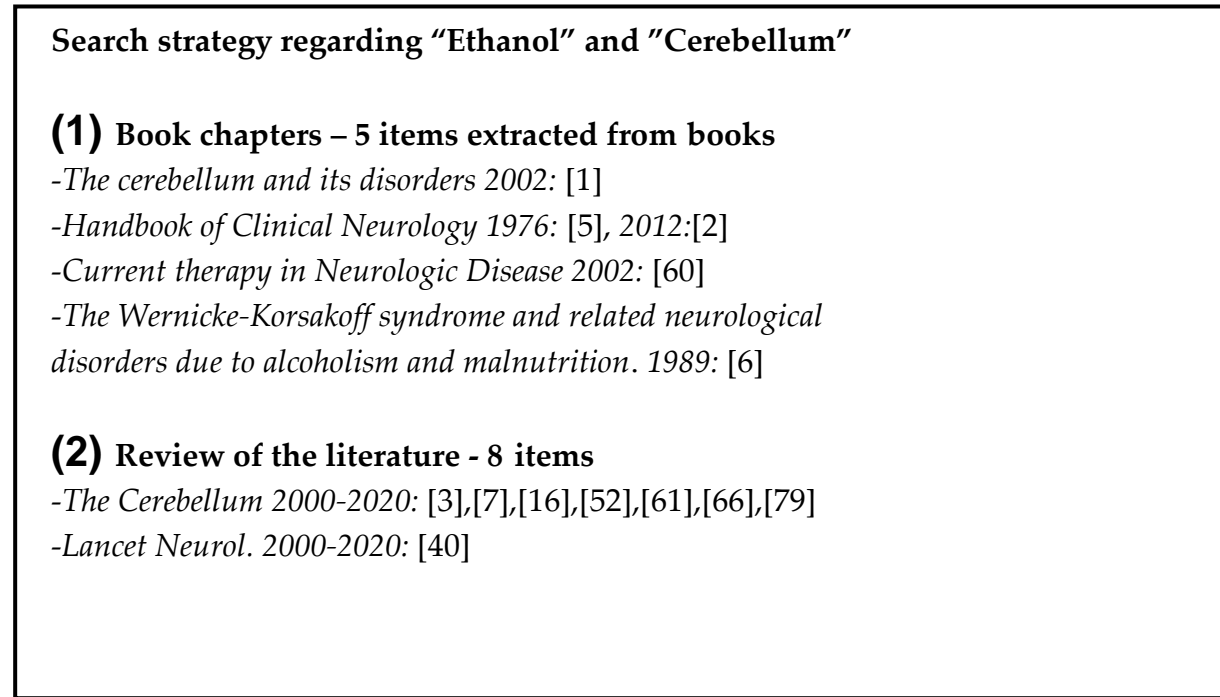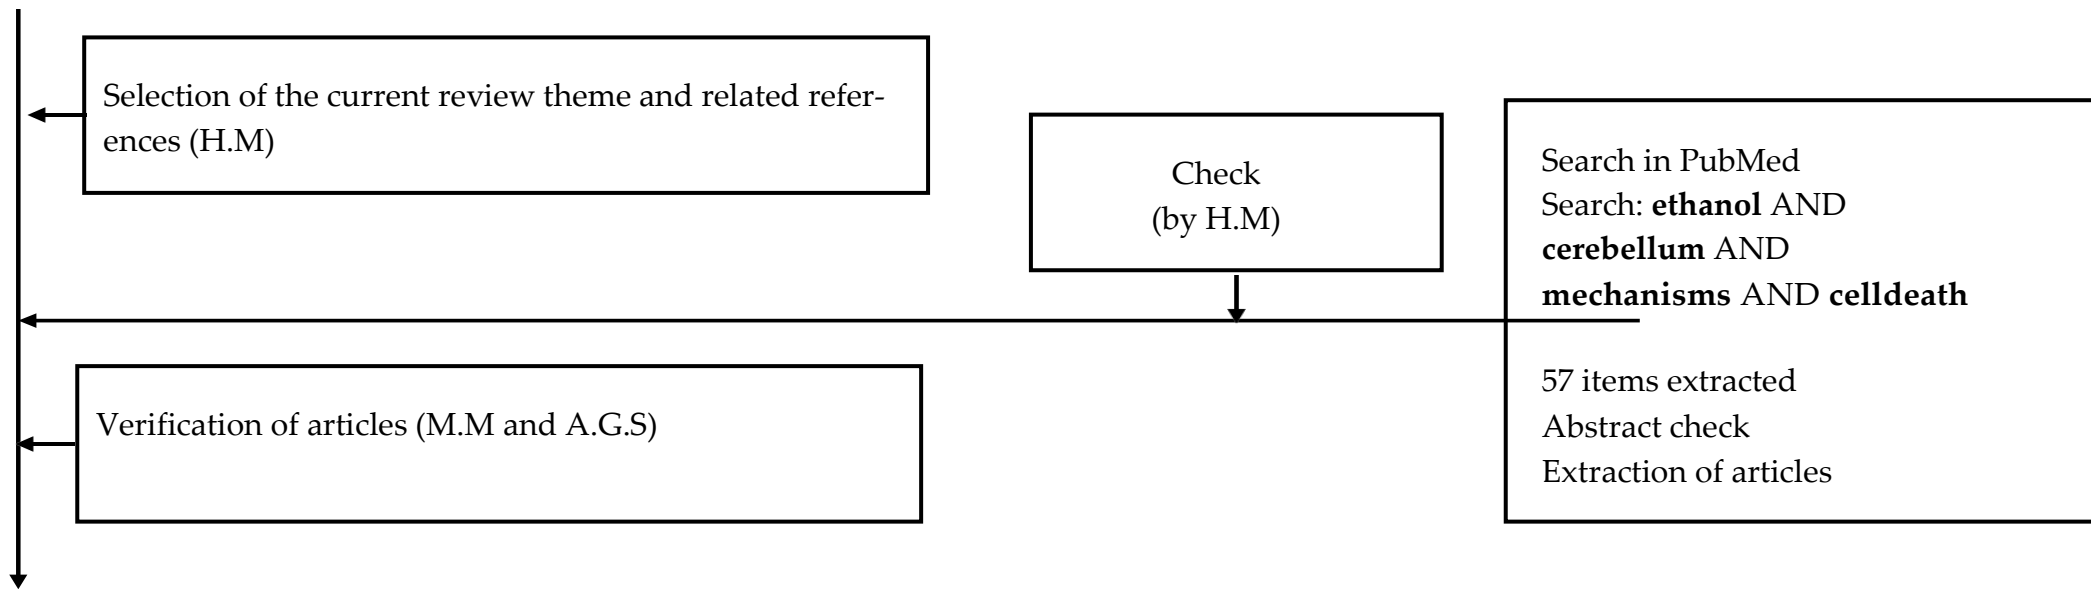

**Figure S1.** Review Algorithm

Supplement: s1 [file s1]
